# Supplementary material for: In vitro fermentation of spent turmeric powder with a mixed culture of pig faecal bacteria
Source: Royal Society of Chemistry journal article supplement (doi:10.1039/c4fo00142g), 2014-07-15
Supplement: c4fo00142g1.pdf [file c4fo00142g1.pdf]

**Table 1** Changes in short-chain fatty acid (SCFA) in batch faecal fermentation

|                    | Incubation time (h) | Cellulose                | Native HAS               | ERF-HAS                  |
|--------------------|---------------------|--------------------------|--------------------------|--------------------------|
|                    |                     | μmol/mL                  |                          |                          |
| Acetate            | 0                   | 3.40 ± 0.50              | 3.90 ± 0.50              | 5.00 ± 1.10              |
|                    | 12                  | 15.5 ± 0.1               | 23.6 ± 2.7               | 29.1 ± 5.1               |
|                    | 24                  | 26.2 ± 0.8               | 41.1 ± 4.7               | 42.2 ± 10.5              |
|                    | 48                  | 48.5 ± 2.7               | 82.4 ± 12.7              | 88.4 ± 20.8              |
| Propionate         | 0                   | 1.50 ± 0.20              | 1.60 ± 0.10              | 2.40 ± 0.7               |
|                    | 12                  | 9.60 ± 0.40 <sup>b</sup> | 19.4 ± 1.2 <sup>ab</sup> | 27.3 ± 4.0 <sup>a</sup>  |
|                    | 24                  | 10.5 ± 0.4 <sup>b</sup>  | 28.6 ± 1.2 <sup>a</sup>  | 32.9 ± 6.5 <sup>a</sup>  |
|                    | 48                  | 22.4 ± 1.2               | 48.9 ± 4.3               | 60.8 ± 15.7              |
| <i>n</i> -Butyrate | 0                   | 0.30 ± 0.20              | 0.40 ± 0.00              | 0.40 ± 0.20              |
|                    | 12                  | 2.50 ± 0.40              | 2.30 ± 0.70              | 2.20 ± 0.90              |
|                    | 24                  | 5.10 ± 0.60              | 5.20 ± 0.50              | 7.00 ± 2.30              |
|                    | 48                  | 8.00 ± 0.10 <sup>b</sup> | 11.0 ± 1.10 <sup>b</sup> | 20.7 ± 3.40 <sup>a</sup> |
| Total SCFA         | 0                   | 5.20 ± 0.80              | 6.00 ± 0.60              | 7.80 ± 1.9               |
|                    | 12                  | 27.5 ± 0.5 <sup>b</sup>  | 45.2 ± 4.5 <sup>ab</sup> | 58.6 ± 10.0 <sup>a</sup> |
|                    | 24                  | 41.8 ± 1.6               | 74.8 ± 6.2               | 82.2 ± 19.2              |
|                    | 48                  | 78.9 ± 2.9               | 142 ± 17                 | 170 ± 39                 |

Each value represents the mean and standard error ( $n = 3$ ). The concentration of all materials in the working volume was 3.0% ( $w/v$ ), respectively. Mean values (a,b,c) with unlike letters within the same time point are significantly different ( $P < 0.05$ ), as determined by ANOVA with the Tukey's test.

**Table 2** Fermentation rate for total SCFA production in batch fecal fermentation

|                     | Cellulose                                  | HAS             | EST             | Main effects ( <i>P</i> -value) |                        |
|---------------------|--------------------------------------------|-----------------|-----------------|---------------------------------|------------------------|
|                     | Fermentation rate ( $\mu\text{mol/h/mL}$ ) |                 |                 | Period (0.018)                  | Group (< 0.001)        |
| Initial (0–12 h)    | 1.67 $\pm$ 0.13                            | 3.99 $\pm$ 0.77 | 5.50 $\pm$ 0.40 | Initial <sup>a</sup>            | Cellulose <sup>b</sup> |
| Mid-term (12–24 h)  | 0.90 $\pm$ 0.40                            | 1.91 $\pm$ 1.46 | 3.17 $\pm$ 0.11 | Middle <sup>b</sup>             | HAS <sup>ab</sup>      |
| End-stage (24–48 h) | 1.20 $\pm$ 0.22                            | 3.30 $\pm$ 0.51 | 4.66 $\pm$ 0.09 | Final <sup>ab</sup>             | EST <sup>a</sup>       |

Each value represents the mean and standard error ( $n = 3$ ). The significant of main effects were determined by two-ANOVA. Main effects (period and group) with unlike letters (a,b) are significantly different at  $p < 0.05$ .
